# Supplementary material
Source: publisher figshare collection journal article supplement (https://gsapubs.figshare.com/articles/dataset/_/12536981)
Supplement: Supplementary file 1 [file 1]

Nereson, A.L., and Finnegan, N.J., 2018, Drivers of earthflow motion revealed by an 80 yr record of displacement from Oak Ridge earthflow, Diablo Range, California, USA: GSA Bulletin, <https://doi.org/10.1130/B32020.1>.

## **Data Repository**

TABLE DR1. HISTORICAL IMAGERY USED FOR DISPLACEMENT ANALYSIS

TABLE DR2. X POSITIONS OF MOBILE GROUND CONTROL POINTS

TABLE DR3. Y POSITIONS OF MOBILE GROUND CONTROL POINTS

TABLE DR4. DECADAL VELOCITY
